# Supplementary material for: Attenuation of Inflammation and Leptin Resistance by Pyrogallol-Phloroglucinol-6,6-Bieckol on in the Brain of Obese Animal Models
Source: PubMed Central journal article supplement (PMC6893810; doi:10.3390/nu11112773), 2019-11-14
Supplement: nutrients-11-02773-s001.pdf [file nutrients-11-02773-s001.pdf]

## Supplementary material

Table S1. List of primer for Quantitative polymerase chain reaction (qRT-PCR)

| Gene          |         | Primers                                |
|---------------|---------|----------------------------------------|
| CD11b         | Forward | 5'-TCAACACAACCAGAGTGGATTC-3'           |
|               | Reverse | 5'- CCTAAAACCAAGCTTTGGACAC-3'          |
| CD86          | Forward | 5'-AGCAACTAATGCTGAAAGCAC-3'            |
|               | Reverse | 5'-CTCAGACCTGCCAAAGTTCTCT-3'           |
| CD206         | Forward | 5'-TGTATTCTTTGCCTTTCCCAGT-3'           |
|               | Reverse | 5'-GATAAAAGCCAGAAGCAGGAGA-3'           |
| TNF- $\alpha$ | Forward | 5'-TTCTGTCTACTGAACTTCGGGGTGATCGGTCC-3' |
|               | Reverse | 5'-GTATGAGATAGCAAATCGGCTGACGGTGTGGG-3' |
| IL-6          | Forward | 5'-CTGCAAGAGACTTCCATCCAGT-3'           |
|               | Reverse | 5'-TCCTCTGTGAAGTCTCCTCTCC-3'           |
| PPAR $\gamma$ | Forward | 5'-TGGCAAAGCATTGTATGACTC-3'            |
|               | Reverse | 5'-ATTTGTCCGTTGTCTTTCCTGT-3'           |
| ACC           | Forward | 5'-AGCTAACCCAACCTCAGCAAGAC-3'          |
|               | Reverse | 5'-GCAAATGGGAAGCAATAAGAAC-3'           |
| FAS           | Forward | 5'-CTCCGAGAGTTTAAAGCTGAGG-3'           |
|               | Reverse | 5'-GGGCCTCCTTGATATAATCCTT-3'           |
| TLR4          | Forward | 5'-ATTCAGAGCCGTTGGTGTATCT-3'           |
|               | Reverse | 5'-TCAAGGACAATGAAGATGATGC-3'           |
| PERK          | Forward | 5'-CATCAGCACTTTAGATGGACGA-3'           |
|               | Reverse | 5'-AGATGAAACCAAGGAACCAGAC-3'           |
| eIF2a         | Forward | 5'-GAAGTGCCTAGTGAGGAGCCTA-3'           |
|               | Reverse | 5'-CTCTTCATGCAGTTTGGAAATTG-3'          |
| IRE1          | Forward | 5'-ATCTGAAAAGGTTCCGCTCATA-3'           |
|               | Reverse | 5'-TAGTGGTGCTTCTTGTTCCTCA-3'           |
| Xbp1          | Forward | 5'-TTGAGGAAGCACCTCTAAGCTC-3'           |
|               | Reverse | 5'-GGATGAAGTCATCTTCCAAAGG-3'           |
| CEBP          | Forward | 5'-AGAAGTCGGTGGACAAGAACAG-3'           |
|               | Reverse | 5'-GTTGCGTTGTTGGCTTTATCT-3'            |
| CD11c         | Forward | 5'-AGAAGTGTTCACCACCCAAAGT-3'           |
|               | Reverse | 5'-CAAGTTGTCCCCTTGTTCCTC-3'            |
| b-actin       | Forward | 5'-ACAAAGCTGTTCAGTGTCTCCA-3'           |
|               | Reverse | 5'-CTCCGTTTCCAGAATACACACA-3'           |

**Table S2. List of antibodies used in Immunoblotting**

| <b>Antigen (host)</b>   | <b>Company</b> | <b>Cat. No</b> | <b>Dilution rate</b> |
|-------------------------|----------------|----------------|----------------------|
| $\beta$ -actin (rabbit) | Abcam          | ab8227         | 1:5,000              |
| NF- $\kappa$ B (rabbit) | Cell signaling | 8242S          | 1:1,000              |
| SOCS3 (mouse)           | Santa cruz     | sc-73045       | 1:1,000              |
| STAT3 (mouse)           | Cell signaling | #9139          | 1:1,000              |
| pSTAT3(mouse)           | Santa cruz     | sc-8059        | 1:1,000              |
| Ob-R (rabbit)           | Abcam          | ab5593         | 1:2,000              |

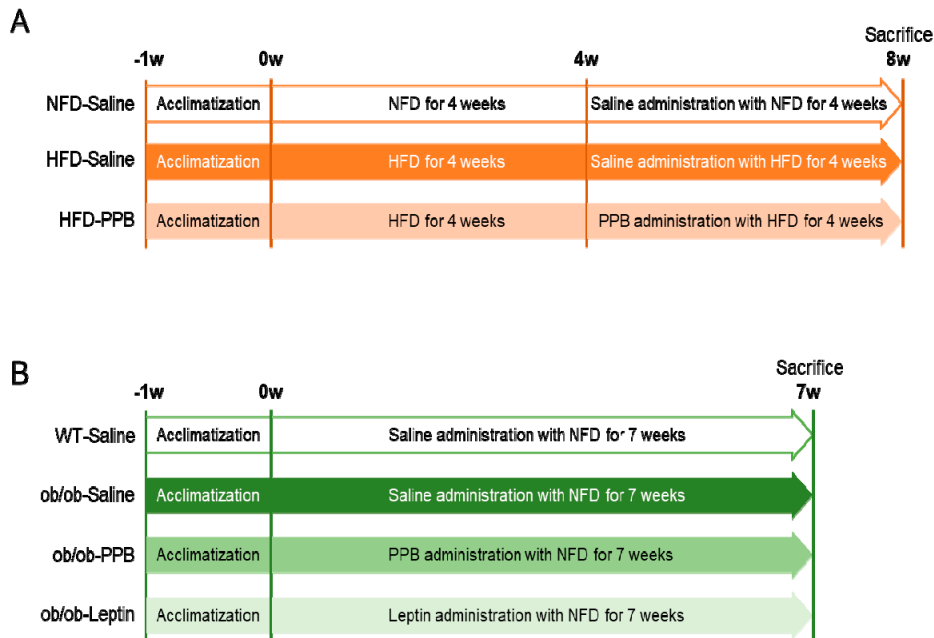

**Figure S1. Experimental scheme image for animal modeling.** Experimental scheme showed animal modeling of diet induced obese mice (DIO) model and leptin deficiency mice (ob/ob) model. (A) To make DIO model, normal fat diet (NFD) or 45% high fat diet (HFD) fed for 4 weeks to C57BL/6 male mice, then 0.9% Saline (HFD-saline) or 2.5 mg/kg PPB (HFD-PPB) was daily administrated with the HFD next 4 weeks. All animals were sacrificed 8 weeks after the start of the experiment. (B) To make ob/ob model, wild type (C57BL/6) mice and ob/ob mice fed NFD for 7 weeks. During 7 weeks, 0.9% Saline (ob/ob-saline), 0.85 mg/kg/day Leptin (ob/ob-Leptin) or 2.5 mg/kg/day PPB (ob/ob-PPB) was daily administrated with the NFD. All animals were sacrificed 7 weeks after the start of the experiment.

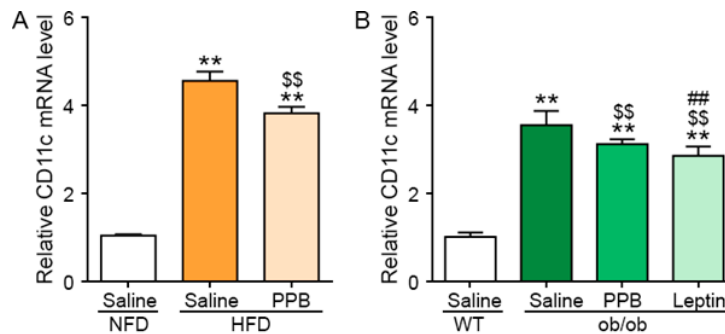

**Figure S2. mRNA expression of CD11c as adipose tissue macrophages in visceral fat tissue.** mRNA levels of CD11c as a adipose tissue macrophage marker in (A) visceral fat of DIO mice model and (B) ob/ob mice model were measured by qRT-PCR. All mRNA levels are expressed as relative levels normalized to  $\beta$ -actin of the NFD-Saline group or WT-saline group. Significance represented as \*\*,  $p < 0.01$  versus NFD-Saline or WT-saline; \$\$,  $p < 0.01$  versus HFD-Saline or ob/ob-Saline; ##,  $p < 0.01$  versus ob/ob-PPB. PPB, pyrogallol-phloroglucinol-6,6-bieckol
